# Supplementary material for: Global and Partial Effect Assessment in Metabolic Syndrome Explored by Metabolomics
Source: MDPI journal article supplement (doi:10.3390/metabo13030373), 2023-03-02
Supplement: s1 [file s1]

# SUPPLEMENTARY MATERIALS

## Global and partial effect assessment in metabolic syndrome explored by metabolomics

Marion Brandolini-Bunlon<sup>1,\*</sup>, Benoit Jaillais<sup>2</sup>, Véronique Cariou<sup>2</sup>, Blandine Comte<sup>1</sup>, Estelle Pujos-Guillot<sup>1</sup> and Evelyne Vigneau<sup>2</sup>

<sup>1</sup> Université Clermont Auvergne, INRAE, UNH, Plateforme d'Exploration du Métabolisme, MetaboHUB  
Clermont, 63000 Clermont-Ferrand, France

<sup>2</sup> Oniris, INRAE, StatSC, 44322 Nantes, France

\* Correspondence: marion.brandolini-bunlon@inrae.fr

### Supplementary Materials:

Table S1: Identifications, Log2 FC, and VIP values of the clinical variables in path 1.

Table S2: Identifications, Log2 FC, and VIP values of the metabolomics variables in path 2.

**Table S1.** Identifications, Log2 FC, and VIP values of the clinical variables in path 1.

| Clinic variables | Identification           | Log2 FC <sup>1</sup><br>(cases / controls) | Global effect (1 cp)<br>Clinic => y |                     |                | Partial effect (2 cp)<br>Clinic residuals => y residuals |                     |                |
|------------------|--------------------------|--------------------------------------------|-------------------------------------|---------------------|----------------|----------------------------------------------------------|---------------------|----------------|
|                  |                          |                                            | observed<br>VIP                     | mean<br>boot<br>VIP | sd boot<br>VIP | observed<br>VIP                                          | mean<br>boot<br>VIP | sd boot<br>VIP |
| HDL              | HDL cholesterol          | -0.338                                     | 0.772                               | 0.758               | 0.167          | 0.771                                                    | 0.760               | 0.326          |
| TG               | triglyceridemia          | 0.861                                      | 1.081                               | 1.076               | 0.134          | 0.620                                                    | 0.624               | 0.209          |
| WC               | waist circumference      | 0.232                                      | 1.524                               | 1.501               | 0.107          | 1.440                                                    | 1.404               | 0.236          |
| GLY              | glycemia                 | 0.359                                      | 1.114                               | 1.097               | 0.127          | 0.362                                                    | 0.381               | 0.194          |
| DBP              | diastolic blood pressure | 0.059                                      | 0.342                               | 0.354               | 0.192          | 0.904                                                    | 0.891               | 0.237          |
| SBP              | systolic blood pressure  | 0.140                                      | 0.742                               | 0.735               | 0.170          | 1.412                                                    | 1.326               | 0.242          |

<sup>1</sup> log2 fold-changes calculated on the initial values.

**Table S2.** Identifications, Log2 FC, and VIP values of the metabolomics variables in path 2.

| Metabo variables     | Method       | Identification             | Log2 FC <sup>1</sup><br>(cases/<br>con-<br>trols) | Global effect (1 cp)<br>Metabo => y |                     |                   | Partial effect (2 cp)<br>Metabo residuals => y<br>residuals |                     |                   |
|----------------------|--------------|----------------------------|---------------------------------------------------|-------------------------------------|---------------------|-------------------|-------------------------------------------------------------|---------------------|-------------------|
|                      |              |                            |                                                   | Observed<br>VIP                     | mean<br>boot<br>VIP | sd<br>boot<br>VIP | Observed<br>VIP                                             | mean<br>boot<br>VIP | sd<br>boot<br>VIP |
| M200 T324            | HILIC<br>neg | 1,5-anhydroglucitol        | -0.050                                            | 1.180                               | 1.112               | 0.307             | 1.997                                                       | 1.477               | 0.451             |
| M187.0577 T1         | C18 pos      | 1,5-anhydroglucitol        | -0.053                                            | 1.224                               | 1.181               | 0.288             | 1.158                                                       | 0.895               | 0.402             |
| M217.1071<br>T22.37  | GCMS         | 1,5-anhydroglucitol        | -0.051                                            | 1.021                               | 1.004               | 0.281             | 0.857                                                       | 0.926               | 0.344             |
| M118.0862 T0.92      | C18 pos      | Betaine                    | -0.019                                            | 1.241                               | 1.163               | 0.325             | 1.935                                                       | 1.521               | 0.561             |
| M368.3451<br>T42.66  | GCMS         | Cholesterol                | -0.003                                            | 0.368                               | 0.470               | 0.243             | 0.489                                                       | 0.691               | 0.324             |
| M361.1703<br>T23.75  | GCMS         | D- $\alpha$ -Glucose       | -0.006                                            | 0.257                               | 0.441               | 0.243             | 0.900                                                       | 1.081               | 0.488             |
| M435.1977<br>T23.75  | GCMS         | D- $\alpha$ -Glucose       | 0.002                                             | 0.284                               | 0.444               | 0.239             | 0.865                                                       | 1.099               | 0.451             |
| M436.2037<br>T23.75  | GCMS         | D- $\alpha$ -Glucose       | 0.027                                             | 0.385                               | 0.560               | 0.262             | 0.459                                                       | 0.948               | 0.371             |
| M62.0133 T23.76      | GCMS         | D- $\alpha$ -Glucose       | 0.114                                             | 0.813                               | 0.835               | 0.271             | 0.753                                                       | 0.950               | 0.318             |
| BV_5.23745012        | NMR          | D- $\alpha$ -Glucose       | 0.009                                             | 1.727                               | 1.616               | 0.174             | 0.773                                                       | 0.636               | 0.301             |
| M319.1593<br>T24.13  | GCMS         | D- $\beta$ -Glucose        | 0.012                                             | 0.534                               | 0.657               | 0.264             | 0.477                                                       | 1.026               | 0.440             |
| M261.1445 T7.64      | C18 pos      | $\gamma$ -Glutamyl-leucine | 0.030                                             | 1.544                               | 1.488               | 0.231             | 0.712                                                       | 0.624               | 0.344             |
| M274 T549            | HILIC<br>neg | Glutamyl-<br>glutamine     | -0.028                                            | 1.432                               | 1.349               | 0.295             | 1.281                                                       | 1.010               | 0.444             |
| V7346                | LIPIDO       | GM3(42:2)                  | -0.025                                            | 0.907                               | 0.869               | 0.242             | 0.817                                                       | 0.622               | 0.337             |
| M188 T139            | HILIC<br>neg | Indole-3-propionic<br>acid | -0.053                                            | 1.143                               | 1.102               | 0.279             | 0.966                                                       | 0.791               | 0.404             |
| M132.1019<br>T1.2_2  | C18 pos      | Isoleucine                 | 0.014                                             | 1.172                               | 1.141               | 0.255             | 0.390                                                       | 0.493               | 0.309             |
| M86.0963 T1.21       | C18 pos      | Isoleucine                 | 0.010                                             | 1.063                               | 1.044               | 0.274             | 0.255                                                       | 0.414               | 0.269             |
| M117.0748<br>T7.08_2 | GCMS         | Lactic acid                | -0.001                                            | 0.159                               | 0.450               | 0.250             | 0.372                                                       | 1.003               | 0.417             |
| M146.0459 T0.91      | C18 neg      | L-Glutamic acid            | 0.063                                             | 1.415                               | 1.359               | 0.282             | 0.749                                                       | 0.676               | 0.402             |
| M496.3397<br>T15.17  | C18 pos      | LPC(16:0_0:0)              | -0.006                                            | 0.859                               | 0.809               | 0.229             | 0.544                                                       | 0.496               | 0.269             |
| M540.3308<br>T15.17  | C18 neg      | LPC(16:0_0:0)              | -0.008                                            | 0.973                               | 0.917               | 0.220             | 0.406                                                       | 0.448               | 0.255             |
| V839                 | LIPIDO       | LPC(P-16:0_0:0)            | -0.005                                            | 0.760                               | 0.644               | 0.194             | 1.125                                                       | 0.792               | 0.425             |
| M522.3554<br>T15.56  | C18 pos      | LPC(18:1_0:0)              | -0.015                                            | 1.029                               | 0.978               | 0.230             | 0.645                                                       | 0.504               | 0.305             |
| M520.3397<br>T14.67  | C18 pos      | LPC(18:2_0:0)              | -0.018                                            | 1.355                               | 1.308               | 0.240             | 0.494                                                       | 0.540               | 0.320             |
| M564.3308<br>T14.67  | C18 neg      | LPC(18:2_0:0)              | -0.037                                            | 1.426                               | 1.371               | 0.242             | 0.618                                                       | 0.608               | 0.363             |
| V1115                | LIPIDO       | LPC(20:1_0:0)              | -0.018                                            | 1.109                               | 1.023               | 0.211             | 0.397                                                       | 0.462               | 0.278             |
| M116.0706 T0.98      | C18 pos      | L-Proline                  | 0.009                                             | 0.678                               | 0.698               | 0.298             | 0.641                                                       | 0.617               | 0.342             |
| M118.0863 T1.19      | C18 pos      | L-Valine                   | 0.009                                             | 1.337                               | 1.263               | 0.211             | 0.288                                                       | 0.504               | 0.274             |
| V3854                | LIPIDO       | PC(18:0_20:3)              | 0.020                                             | 1.937                               | 1.784               | 0.255             | 2.205                                                       | 1.713               | 0.460             |

|                  |           |                                 |        |       |       |       |       |       |       |
|------------------|-----------|---------------------------------|--------|-------|-------|-------|-------|-------|-------|
| V3734            | LIPIDO    | PC(P-39:5)                      | -0.021 | 0.574 | 0.602 | 0.284 | 0.761 | 0.650 | 0.321 |
| V2975            | LIPIDO    | PE(18:0_20:4)                   | 0.038  | 1.663 | 1.590 | 0.283 | 1.169 | 0.918 | 0.408 |
| M130.0862 T1.19  | C18 pos   | Pipecolic acid                  | -0.031 | 1.068 | 1.026 | 0.320 | 1.072 | 0.869 | 0.441 |
| M144.1018 T1.04  | C18 pos   | Proline Betaine                 | 0.051  | 0.472 | 0.538 | 0.273 | 0.470 | 0.599 | 0.339 |
| V5261            | LIPIDO    | TG(16:0_18:1_18:1)              | 0.062  | 2.113 | 1.999 | 0.261 | 1.144 | 0.962 | 0.398 |
| M61.0393 T0.95   | C18 pos   | Urea                            | 0.009  | 0.697 | 0.729 | 0.237 | 1.014 | 0.819 | 0.438 |
| M174.0571 T6.89  | GCMS      | 2-(methoxyimino)-propanoic acid | 0.044  | 0.866 | 0.906 | 0.237 | 1.259 | 1.244 | 0.362 |
| M178 T555        | HILIC neg | Glucosamine                     | 0.022  | 1.439 | 1.302 | 0.199 | 0.695 | 0.648 | 0.385 |
| BV_1.273         | NMR       | LDL, VLDL                       | 0.018  | 1.818 | 1.763 | 0.268 | 0.353 | 0.458 | 0.277 |
| M292.1333 T15.77 | GCMS      | Threonic acid                   | -0.034 | 0.517 | 0.597 | 0.255 | 0.740 | 0.959 | 0.290 |
| M261.0113 T0.92  | C18 pos   | Caffeic acid 3 or 4-sulfate     | 0.008  | 1.238 | 1.175 | 0.227 | 0.639 | 0.608 | 0.301 |
| M223.0925 T0.93  | C18 pos   | Hexahydroxyheptane hydrazide    | 0.040  | 1.350 | 1.299 | 0.231 | 0.871 | 0.706 | 0.362 |
| M163.06 T0.91_1  | C18 pos   | Hexoses                         | 0.040  | 1.519 | 1.446 | 0.239 | 0.504 | 0.521 | 0.303 |
| M101.0244 T0.93  | C18 neg   | Hexoses                         | 0.046  | 1.825 | 1.724 | 0.171 | 0.478 | 0.455 | 0.237 |
| M203.0526 T0.91  | C18 pos   | Hexoses                         | 0.014  | 1.521 | 1.403 | 0.234 | 0.595 | 0.484 | 0.237 |
| M215.0328 T0.91  | C18 neg   | Hexoses                         | 0.018  | 1.523 | 1.409 | 0.179 | 0.590 | 0.496 | 0.310 |
| M179 T471        | HILIC neg | Hexoses                         | 0.021  | 1.876 | 1.771 | 0.171 | 0.512 | 0.435 | 0.221 |
| M504.3085 T15.12 | C18 pos   | LPC                             | 0.009  | 0.820 | 0.736 | 0.288 | 1.184 | 1.030 | 0.464 |
| M114.0661 T0.95  | C18 pos   | Unknown                         | 0.004  | 0.503 | 0.541 | 0.215 | 0.939 | 0.710 | 0.384 |
| M117.0726 T6.09  | GCMS      | Unknown                         | -0.003 | 0.136 | 0.406 | 0.204 | 0.648 | 0.838 | 0.321 |
| M165.0697 T8.42  | GCMS      | Unknown                         | 0.004  | 0.218 | 0.413 | 0.212 | 0.461 | 0.594 | 0.352 |
| M174.1093 T23.8  | GCMS      | Unknown                         | 0.010  | 0.453 | 0.561 | 0.282 | 0.353 | 0.957 | 0.380 |
| M191.0913 T8.63  | GCMS      | Unknown                         | -0.014 | 0.415 | 0.540 | 0.240 | 0.411 | 0.801 | 0.321 |
| M205.1067 T10.37 | GCMS      | Unknown                         | -0.008 | 0.105 | 0.393 | 0.211 | 0.575 | 0.563 | 0.291 |
| M218 T213        | HILIC neg | Unknown                         | 0.027  | 1.156 | 1.026 | 0.349 | 1.697 | 1.310 | 0.564 |
| M246.1335 T16.84 | GCMS      | Unknown                         | 0.036  | 0.592 | 0.682 | 0.257 | 0.147 | 0.881 | 0.343 |
| M267.0853 T14.44 | GCMS      | Unknown                         | 0.050  | 0.278 | 0.412 | 0.259 | 0.929 | 0.832 | 0.479 |
| M299.0723 T10.38 | GCMS      | Unknown                         | 0.006  | 0.352 | 0.497 | 0.235 | 1.291 | 1.107 | 0.357 |
| M313.256 T26.23  | GCMS      | Unknown                         | 0.010  | 0.660 | 0.626 | 0.280 | 1.252 | 1.011 | 0.432 |
| M318.1493 T27.96 | GCMS      | Unknown                         | -0.000 | 0.150 | 0.465 | 0.232 | 0.681 | 1.014 | 0.420 |
| M72.08 T24.9     | GCMS      | Unknown                         | -0.042 | 0.864 | 0.886 | 0.252 | 0.838 | 1.054 | 0.306 |
| M218.1024 T13.73 | GCMS      | Unknown                         | 0.003  | 0.541 | 0.573 | 0.252 | 0.856 | 1.098 | 0.334 |
| M72.0354 T9.76   | GCMS      | Unknown                         | -0.002 | 0.179 | 0.431 | 0.217 | 0.333 | 0.902 | 0.404 |
| V1738            | LIPIDO    | Unknown                         | -0.003 | 0.610 | 0.576 | 0.303 | 1.592 | 1.219 | 0.549 |
| V2165            | LIPIDO    | Unknown                         | 0.006  | 1.069 | 0.895 | 0.251 | 2.118 | 1.567 | 0.427 |
| V4198            | LIPIDO    | Unknown                         | 0.023  | 1.065 | 0.922 | 0.293 | 1.722 | 1.296 | 0.422 |
| V5931            | LIPIDO    | Unknown                         | 0.015  | 1.021 | 0.876 | 0.288 | 2.253 | 1.636 | 0.522 |

|                      |              |         |        |       |       |       |       |       |       |
|----------------------|--------------|---------|--------|-------|-------|-------|-------|-------|-------|
| V983                 | LIPIDO       | Unknown | 0.005  | 1.227 | 0.938 | 0.293 | 1.727 | 1.255 | 0.438 |
| M102.041 T7.99       | GCMS         | Unknown | -0.024 | 0.546 | 0.588 | 0.224 | 0.856 | 0.952 | 0.337 |
| M104.1073 T0.88      | C18 pos      | Unknown | 0.003  | 0.328 | 0.447 | 0.219 | 0.727 | 0.617 | 0.311 |
| M116.0892 T7.74      | GCMS         | Unknown | 0.003  | 0.187 | 0.435 | 0.223 | 0.090 | 0.926 | 0.387 |
| M131.0885 T8.14      | GCMS         | Unknown | 0.030  | 0.668 | 0.747 | 0.259 | 0.840 | 1.106 | 0.338 |
| M146 T556            | HILIC<br>neg | Unknown | 0.049  | 0.478 | 0.558 | 0.248 | 0.894 | 0.731 | 0.379 |
| M159 T578            | HILIC<br>neg | Unknown | -0.047 | 1.095 | 0.934 | 0.401 | 2.321 | 1.831 | 0.553 |
| M172.0652 T9.13      | GCMS         | Unknown | -0.062 | 0.363 | 0.494 | 0.235 | 0.244 | 0.692 | 0.287 |
| M177.0754 T8.64      | GCMS         | Unknown | 0.036  | 0.785 | 0.852 | 0.238 | 1.322 | 1.388 | 0.338 |
| M178 T285            | HILIC<br>neg | Unknown | -0.022 | 1.245 | 1.193 | 0.289 | 1.209 | 0.934 | 0.460 |
| M185.1096<br>T15.77  | GCMS         | Unknown | -0.028 | 0.760 | 0.737 | 0.237 | 1.544 | 1.461 | 0.347 |
| M185 T80             | HILIC<br>neg | Unknown | -0.022 | 1.135 | 1.023 | 0.348 | 1.643 | 1.258 | 0.545 |
| M189.0924 T9.75      | GCMS         | Unknown | -0.000 | 0.089 | 0.391 | 0.243 | 0.148 | 0.897 | 0.466 |
| M190.0898<br>T9.76_2 | GCMS         | Unknown | -0.000 | 0.140 | 0.436 | 0.244 | 0.503 | 0.988 | 0.471 |
| M204.0992<br>T25.67  | GCMS         | Unknown | -0.004 | 0.049 | 0.368 | 0.206 | 0.522 | 0.604 | 0.356 |
| M204.099 T24.58      | GCMS         | Unknown | -0.046 | 0.523 | 0.611 | 0.263 | 0.708 | 0.839 | 0.394 |
| M225 T472            | HILIC<br>neg | Unknown | 0.028  | 1.141 | 1.077 | 0.219 | 0.310 | 0.456 | 0.267 |
| M268 T461            | HILIC<br>neg | Unknown | 0.047  | 1.328 | 1.254 | 0.222 | 0.379 | 0.480 | 0.269 |
| M273.0969<br>T21.66  | GCMS         | Unknown | -0.020 | 0.448 | 0.607 | 0.218 | 0.276 | 0.989 | 0.391 |
| M274.9885 T0.91      | C18 neg      | Unknown | 0.041  | 1.476 | 1.407 | 0.199 | 0.335 | 0.426 | 0.246 |
| M293 T579            | HILIC<br>neg | Unknown | 0.035  | 1.287 | 1.218 | 0.193 | 0.843 | 0.778 | 0.409 |
| M305.918 T0.9        | C18 neg      | Unknown | 0.040  | 1.175 | 1.131 | 0.205 | 0.442 | 0.521 | 0.329 |
| M333.1365<br>T24.62  | GCMS         | Unknown | 0.053  | 0.864 | 0.842 | 0.259 | 1.870 | 1.568 | 0.404 |
| M357.1124<br>T20.38  | GCMS         | Unknown | -0.035 | 0.622 | 0.698 | 0.269 | 0.373 | 0.902 | 0.357 |
| M456.1862<br>T28.17  | GCMS         | Unknown | -0.010 | 0.870 | 0.758 | 0.279 | 1.591 | 1.406 | 0.428 |
| M55.0175 T0.92       | C18 pos      | Unknown | 0.027  | 1.231 | 1.183 | 0.279 | 0.581 | 0.557 | 0.314 |
| M618 T458_1          | HILIC<br>neg | Unknown | -0.026 | 0.655 | 0.685 | 0.270 | 0.715 | 0.699 | 0.408 |
| M698.7868<br>T9.52_1 | C18 pos      | Unknown | 0.011  | 0.593 | 0.601 | 0.280 | 0.615 | 0.650 | 0.349 |
| M698 T452            | HILIC<br>neg | Unknown | 0.015  | 0.604 | 0.589 | 0.264 | 1.342 | 1.097 | 0.469 |
| M733.3319 T8.51      | C18 pos      | Unknown | 0.002  | 0.463 | 0.473 | 0.217 | 0.844 | 0.778 | 0.429 |
| M74.0392 T23.43      | GCMS         | Unknown | 0.000  | 0.470 | 0.493 | 0.268 | 0.687 | 0.739 | 0.366 |
| M76.0288 T9.76       | GCMS         | Unknown | 0.013  | 0.427 | 0.496 | 0.226 | 0.659 | 0.704 | 0.354 |
| M87 T265             | HILIC<br>neg | Unknown | 0.037  | 1.143 | 1.023 | 0.312 | 1.544 | 1.194 | 0.429 |

|          |              |         |        |       |       |       |       |       |       |
|----------|--------------|---------|--------|-------|-------|-------|-------|-------|-------|
| M95 T977 | HILIC<br>neg | Unknown | -0.025 | 0.319 | 0.507 | 0.255 | 0.535 | 0.552 | 0.348 |
| V4330    | LIPIDO       | Unknown | -0.027 | 1.061 | 1.023 | 0.244 | 0.621 | 0.570 | 0.291 |
| V5157    | LIPIDO       | Unknown | -0.017 | 0.805 | 0.715 | 0.244 | 1.180 | 0.871 | 0.438 |

<sup>1</sup> log2 fold-changes calculated on the initial values.
